# Supplementary material
Source: publisher site journal article supplement (https://www.dovepress.com/article/240443)
Supplement: Supplementary file 1 [file get_supplementary_file.php]

## **Supplementary information**

### ***1. Additional questions***

1. The dispenser was simple to use
2. The dispenser was simple to carry around
3. The mobile application was simple to use
4. Dispensing is more difficult than standard packaging
5. I found benefits from using the Pill Connect system
6. It was beneficial to know my health professional received information about my medicine
7. It was useful having the dispenser give me the correct quantity
8. It was useful being reminded by the application
9. It was useful seeing my upcoming doses on the application
10. I find remembering to take my medicine at the correct time difficult
11. I would like help for taking my medicines on time
